# Supplementary material
Source: PubMed Central journal article supplement (PMC5437814)

Full blots of Figure 5

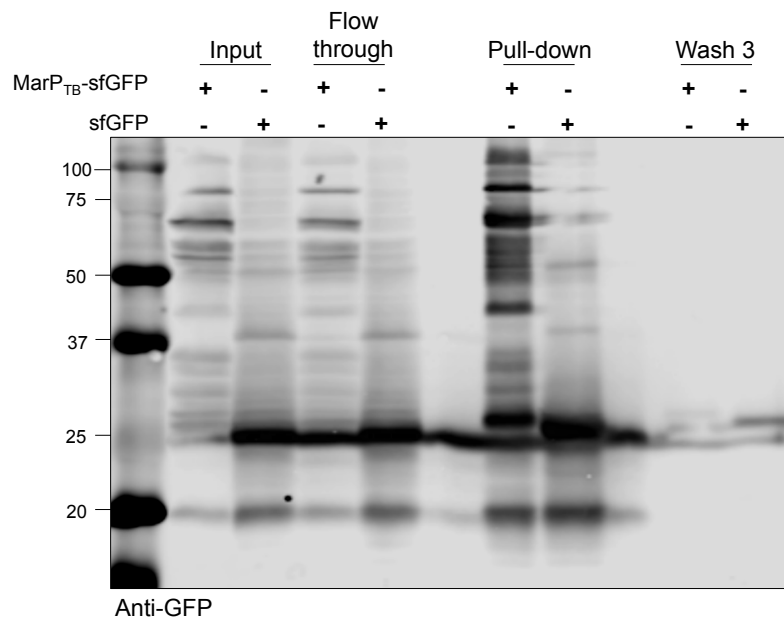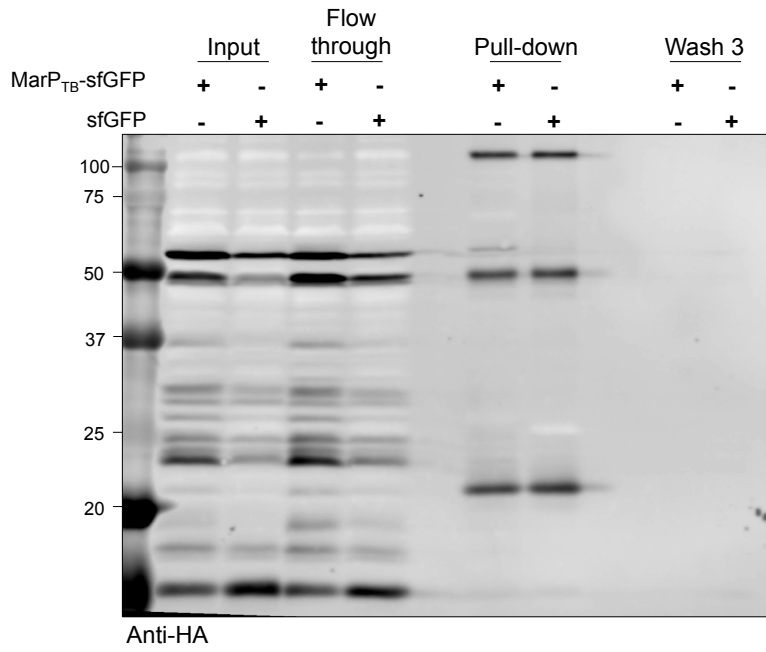

Supplement: EMBJ-36-536-s003.pdf [file EMBJ-36-536-s003.pdf]
